# Supplementary material for: Gut Microbiota Condition the Therapeutic Efficacy of Trastuzumab in HER2-Positive Breast Cancer
Source: Oxford University Press journal article supplement (doi:10.1158/0008-5472.can-20-1659), 2021-01-22
Supplement: 00085472can201659-sup-243567_2_supp_6799890_qlp5m9.xlsx [file 00085472can201659-sup-243567_2_supp_6799890_qlp5m9.xlsx]

## Sheet: Table S2
	Table S2. Enrichment analysis by DAVID in the ileum of mice
	DAVID analysis results for ileum performed by using significantly DEGs (FDR<0.05 for ileum).
	DAVID Ileum
	Annotation Cluster 1	Enrichment Score: 4.3251095721527575	Fold Enrichment	FDR
	GOTERM_BP_DIRECT	GO:0002504~antigen processing and presentation of peptide or polysaccharide antigen via MHC class II	79.57	0.02
	GOTERM_CC_DIRECT	GO:0042613~MHC class II protein complex	75.86	0.0004
	UP_KEYWORDS	MHC II	71.1	0.0243
	INTERPRO	IPR014745:MHC class II, alpha/beta chain, N-terminal	66.27	0.0325
	GOTERM_BP_DIRECT	GO:0019886~antigen processing and presentation of exogenous peptide antigen via MHC class II	63.94	0.0013
	GOTERM_BP_DIRECT	GO:0034341~response to interferon-gamma	34.43	0.0178
	UP_SEQ_FEATURE	domain:Ig-like C1-type	31.94	0.0015
	KEGG_PATHWAY	mmu04672:Intestinal immune network for IgA production	27.13	0
	GOTERM_BP_DIRECT	GO:0019882~antigen processing and presentation	26.52	0
	UP_SEQ_FEATURE	region of interest:Connecting peptide	25.21	0.0584
	GOTERM_MF_DIRECT	GO:0042605~peptide antigen binding	23.5	0.0066
	KEGG_PATHWAY	mmu05332:Graft-versus-host disease	21.91	0.0001
	INTERPRO	IPR011162:MHC classes I/II-like antigen recognition protein	21.13	0.0001
	KEGG_PATHWAY	mmu05330:Allograft rejection	20.35	0.0001
	INTERPRO	IPR003006:Immunoglobulin/major histocompatibility complex, conserved site	19.3	0
	KEGG_PATHWAY	mmu04940:Type I diabetes mellitus	18.38	0.0002
	KEGG_PATHWAY	mmu04612:Antigen processing and presentation	17.37	0
	KEGG_PATHWAY	mmu05150:Staphylococcus aureus infection	17.09	0.0235
	INTERPRO	IPR003597:Immunoglobulin C1-set	16.24	0.0001
	KEGG_PATHWAY	mmu05320:Autoimmune thyroid disease	16.05	0.0005
	SMART	SM00407:IGc1	13.68	0.0002
	KEGG_PATHWAY	mmu05416:Viral myocarditis	12.62	0.0166
	GOTERM_BP_DIRECT	GO:0006955~immune response	10.53	0
	KEGG_PATHWAY	mmu05168:Herpes simplex infection	8.22	0.0001
	KEGG_PATHWAY	mmu04145:Phagosome	7.5	0.0209
	INTERPRO	IPR007110:Immunoglobulin-like domain	3.57	0.0124
	INTERPRO	IPR013783:Immunoglobulin-like fold	3.15	0.0337
	Annotation Cluster 2	Enrichment Score: 3.242307367676471	Fold Enrichment	FDR
	GOTERM_CC_DIRECT	GO:0009897~external side of plasma membrane	7.47	0.0002
	UP_SEQ_FEATURE	disulfide bond	2.6	0.0002
	UP_KEYWORDS	Disulfide bond	2.57	0
	UP_SEQ_FEATURE	glycosylation site:N-linked (GlcNAc...)	2.1	0.0033
	UP_KEYWORDS	Signal	1.85	0.0348
	Annotation Cluster 3	Enrichment Score: 2.9139498512316426	Fold Enrichment	FDR
	INTERPRO	IPR007743:Interferon-inducible GTPase	50.62	0.0031
	GOTERM_BP_DIRECT	GO:0006952~defense response	10.8	0.0663
	Annotation Cluster 4	Enrichment Score: 2.607981752126335	Fold Enrichment	FDR
	UP_SEQ_FEATURE	chain:Tumor necrosis factor ligand superfamily member 13	191.62	0.1071
	UP_SEQ_FEATURE	chain:Tumor necrosis factor ligand superfamily member 12, secreted form	191.62	0.1071
	UP_SEQ_FEATURE	chain:Tumor necrosis factor ligand superfamily member 12, membrane form	191.62	0.1071
	Annotation Cluster 5	Enrichment Score: 2.454411446549014	Fold Enrichment	FDR
	INTERPRO	IPR007110:Immunoglobulin-like domain	3.57	0.0124
	INTERPRO	IPR013783:Immunoglobulin-like fold	3.15	0.0337

## Sheet: Table S3
	Table S3. Pathway enrichment analysis by GSEA in the ileum of mice
	NoA vs Vanco
	Name	NES	FDR q-val
	GO_RESPONSE_TO_INTERFERON_GAMMA	2.34805	0
	GO_INTERFERON_GAMMA_MEDIATED_SIGNALING_PATHWAY	2.3418	0
	GO_RESPONSE_TO_TYPE_I_INTERFERON	2.31452	0
	GO_CYTOPLASMIC_PATTERN_RECOGNITION_RECEPTOR_SIGNALING_PATHWAY	2.2086	0.00166236
	KEGG_ANTIGEN_PROCESSING_AND_PRESENTATION	2.17918	0.00228641
	GO_T_CELL_RECEPTOR_SIGNALING_PATHWAY	2.17887	0.00190534
	GO_REGULATION_OF_RESPONSE_TO_INTERFERON_GAMMA	2.17394	0.00163315
	GO_INTERLEUKIN_10_PRODUCTION	2.10046	0.00258567
	GO_POSITIVE_REGULATION_OF_ANTIGEN_RECEPTOR_MEDIATED_SIGNALING_PATHWAY	2.06165	0.00569558
	GO_CYTOKINE_PRODUCTION_INVOLVED_IN_INFLAMMATORY_RESPONSE	2.03731	0.00715131
	GO_ANTIGEN_PROCESSING_AND_PRESENTATION_OF_PEPTIDE_ANTIGEN_VIA_MHC_CLASS_I	2.0175	0.00819227
	GO_ANTIGEN_PROCESSING_AND_PRESENTATION_OF_EXOGENOUS_PEPTIDE_ANTIGEN_VIA_MHC_CLASS_I	2.01651	0.00750958
	GO_POSITIVE_REGULATION_OF_TYPE_I_INTERFERON_PRODUCTION	2.01555	0.00710902
	GO_ALPHA_BETA_T_CELL_DIFFERENTIATION	1.99977	0.00795964
	GO_ALPHA_BETA_T_CELL_ACTIVATION	1.98801	0.00898989
	KEGG_INTESTINAL_IMMUNE_NETWORK_FOR_IGA_PRODUCTION	1.97697	0.0100265
	GO_REGULATION_OF_ALPHA_BETA_T_CELL_DIFFERENTIATION	1.97193	0.0102153
	GO_POSITIVE_REGULATION_OF_INTERLEUKIN_10_PRODUCTION	1.96776	0.0104027
	GO_TYPE_I_INTERFERON_PRODUCTION	1.96772	0.00985523
	GO_REGULATION_OF_TYPE_I_INTERFERON_MEDIATED_SIGNALING_PATHWAY	1.94709	0.011525
	GO_REGULATION_OF_ALPHA_BETA_T_CELL_ACTIVATION	1.93885	0.0118526
	GO_CD4_POSITIVE_ALPHA_BETA_T_CELL_ACTIVATION	1.92232	0.0134174
	KEGG_NATURAL_KILLER_CELL_MEDIATED_CYTOTOXICITY	1.92093	0.0128341
	GO_T_CELL_DIFFERENTIATION	1.91536	0.0130122
	GO_MYELOID_DENDRITIC_CELL_DIFFERENTIATION	1.9052	0.0138267
	GO_ANTIGEN_RECEPTOR_MEDIATED_SIGNALING_PATHWAY	1.89861	0.0140058
	GO_NATURAL_KILLER_CELL_MEDIATED_IMMUNITY	1.89626	0.014128
	GO_REGULATION_OF_INNATE_IMMUNE_RESPONSE	1.89161	0.0142887
	GO_POSITIVE_REGULATION_OF_LYMPHOCYTE_APOPTOTIC_PROCESS	1.89027	0.0141138
	GO_REGULATION_OF_TYPE_2_IMMUNE_RESPONSE	1.87748	0.0151758
	GO_INTERFERON_GAMMA_PRODUCTION	1.8647	0.0161342
	GO_REGULATION_OF_CD4_POSITIVE_ALPHA_BETA_T_CELL_DIFFERENTIATION	1.86195	0.0160735
	GO_INTERLEUKIN_8_PRODUCTION	1.86189	0.0155864
	GO_RESPONSE_TO_INTERFERON_BETA	1.846	0.0174437
	GO_POSITIVE_REGULATION_OF_ADAPTIVE_IMMUNE_RESPONSE	1.83918	0.0179849
	GO_T_CELL_ACTIVATION	1.82942	0.0189635
	GO_REGULATION_OF_CD4_POSITIVE_ALPHA_BETA_T_CELL_ACTIVATION	1.82293	0.0201379
	KEGG_RIG_I_LIKE_RECEPTOR_SIGNALING_PATHWAY	1.81303	0.0220528
	GO_LEUKOCYTE_MEDIATED_CYTOTOXICITY	1.80658	0.0232283
	GO_ANTIGEN_PROCESSING_AND_PRESENTATION_OF_PEPTIDE_ANTIGEN	1.80407	0.0231702
	GO_ALPHA_BETA_T_CELL_PROLIFERATION	1.80368	0.022664
	GO_NEGATIVE_REGULATION_OF_INTERLEUKIN_10_PRODUCTION	1.80288	0.0224169
	GO_LYMPHOCYTE_MEDIATED_IMMUNITY	1.80083	0.0222805
	GO_REGULATION_OF_T_CELL_DIFFERENTIATION	1.79821	0.0221937
	GO_TYPE_2_IMMUNE_RESPONSE	1.78397	0.0239459
	GO_POSITIVE_REGULATION_OF_INTERFERON_BETA_PRODUCTION	1.77258	0.0257125
	GO_T_CELL_DIFFERENTIATION_INVOLVED_IN_IMMUNE_RESPONSE	1.76921	0.0258743
	GO_POSITIVE_REGULATION_OF_ALPHA_BETA_T_CELL_ACTIVATION	1.7604	0.0271395
	GO_REGULATION_OF_T_CELL_ACTIVATION	1.75959	0.026723
	GO_LEUKOCYTE_CELL_CELL_ADHESION	1.75398	0.0279336
	GO_T_CELL_ACTIVATION_INVOLVED_IN_IMMUNE_RESPONSE	1.75147	0.0278695
	GO_RESPONSE_TO_TUMOR_NECROSIS_FACTOR	1.74522	0.0292226
	GO_NEGATIVE_REGULATION_OF_CD4_POSITIVE_ALPHA_BETA_T_CELL_ACTIVATION	1.7449	0.0287154
	KEGG_TOLL_LIKE_RECEPTOR_SIGNALING_PATHWAY	1.73532	0.0307829
	GO_PATTERN_RECOGNITION_RECEPTOR_SIGNALING_PATHWAY	1.71819	0.0346485
	GO_POSITIVE_REGULATION_OF_INTERFERON_GAMMA_PRODUCTION	1.71068	0.0360918
	GO_ANTIGEN_PROCESSING_AND_PRESENTATION	1.70742	0.0363374
	GO_REGULATION_OF_T_CELL_RECEPTOR_SIGNALING_PATHWAY	1.7061	0.0362119
	GO_REGULATION_OF_LEUKOCYTE_MEDIATED_IMMUNITY	1.70126	0.037702
	GO_POSITIVE_REGULATION_OF_IMMUNE_EFFECTOR_PROCESS	1.69397	0.0389629
	GO_REGULATION_OF_LYMPHOCYTE_DIFFERENTIATION	1.67595	0.045522
	GO_REGULATION_OF_INFLAMMATORY_RESPONSE	1.67394	0.0454547
	GO_REGULATION_OF_T_HELPER_CELL_DIFFERENTIATION	1.67306	0.0450233
	GO_NEGATIVE_REGULATION_OF_CD4_POSITIVE_ALPHA_BETA_T_CELL_DIFFERENTIATION	1.66944	0.0459298
	GO_REGULATION_OF_MYELOID_LEUKOCYTE_MEDIATED_IMMUNITY	1.66811	0.0457246
	GO_POSITIVE_REGULATION_OF_ALPHA_BETA_T_CELL_DIFFERENTIATION	1.66794	0.0451737
	GO_POSITIVE_REGULATION_OF_CYTOKINE_PRODUCTION	1.66747	0.0446733
	GO_ACTIVATION_OF_INNATE_IMMUNE_RESPONSE	1.66739	0.0440513
	GO_PRODUCTION_OF_MOLECULAR_MEDIATOR_OF_IMMUNE_RESPONSE	1.66721	0.0435077
	KEGG_NOD_LIKE_RECEPTOR_SIGNALING_PATHWAY	1.66659	0.0429178
	GO_REGULATION_OF_LEUKOCYTE_DIFFERENTIATION	1.66591	0.0424696
	GO_NEGATIVE_REGULATION_OF_LEUKOCYTE_CELL_CELL_ADHESION	1.66492	0.0423101
	GO_DENDRITIC_CELL_DIFFERENTIATION	1.66016	0.0435525
	GO_POSITIVE_REGULATION_OF_LYMPHOCYTE_DIFFERENTIATION	1.65174	0.0453779
	GO_CYTOPLASMIC_PATTERN_RECOGNITION_RECEPTOR_SIGNALING_PATHWAY_IN_RESPONSE_TO_VIRUS	1.64692	0.0465382
	GO_LYMPHOCYTE_HOMEOSTASIS	1.64623	0.0460714
	GO_POSITIVE_REGULATION_OF_PRODUCTION_OF_MOLECULAR_MEDIATOR_OF_IMMUNE_RESPONSE	1.62929	0.0515798
	GO_REGULATION_OF_TOLL_LIKE_RECEPTOR_SIGNALING_PATHWAY	1.62888	0.0510702
	GO_NEGATIVE_REGULATION_OF_TOLL_LIKE_RECEPTOR_SIGNALING_PATHWAY	1.62353	0.0522961
	GO_LYMPHOCYTE_APOPTOTIC_PROCESS	1.6176	0.054031
	GO_REGULATION_OF_T_CELL_APOPTOTIC_PROCESS	1.61687	0.053624
	GO_T_CELL_MEDIATED_IMMUNITY	1.60988	0.056058
	GO_B_CELL_HOMEOSTASIS	1.60942	0.0554912
	GO_TUMOR_NECROSIS_FACTOR_MEDIATED_SIGNALING_PATHWAY	1.60733	0.0556353
	GO_CYTOKINE_SECRETION_INVOLVED_IN_IMMUNE_RESPONSE	1.60568	0.0557744
	GO_POSITIVE_REGULATION_OF_LEUKOCYTE_MEDIATED_IMMUNITY	1.60098	0.0572779
	GO_MYELOID_DENDRITIC_CELL_ACTIVATION	1.5931	0.0595375
	GO_POSITIVE_REGULATION_OF_CYTOKINE_PRODUCTION_INVOLVED_IN_IMMUNE_RESPONSE	1.59275	0.0590168
	GO_FC_EPSILON_RECEPTOR_SIGNALING_PATHWAY	1.59147	0.0591011
	GO_INTERLEUKIN_8_SECRETION	1.58817	0.0597209
	GO_FC_RECEPTOR_SIGNALING_PATHWAY	1.58052	0.0619851
	GO_LEUKOCYTE_DIFFERENTIATION	1.5786	0.0621364
	KEGG_CHEMOKINE_SIGNALING_PATHWAY	1.57539	0.0626981
	GO_NEGATIVE_REGULATION_OF_LEUKOCYTE_DIFFERENTIATION	1.57306	0.0627119
	GO_NEGATIVE_REGULATION_OF_ALPHA_BETA_T_CELL_ACTIVATION	1.57106	0.0627648
	GO_POSITIVE_REGULATION_OF_INTERLEUKIN_8_PRODUCTION	1.56767	0.0638386
	GO_T_CELL_CYTOKINE_PRODUCTION	1.5676	0.063229
	GO_T_HELPER_17_TYPE_IMMUNE_RESPONSE	1.56558	0.0634069
	GO_MYD88_INDEPENDENT_TOLL_LIKE_RECEPTOR_SIGNALING_PATHWAY	1.56137	0.0650078
	GO_REGULATION_OF_T_CELL_MEDIATED_IMMUNITY	1.5586	0.0654848
	GO_REGULATION_OF_IMMUNE_EFFECTOR_PROCESS	1.55828	0.065028
	GO_LYMPHOCYTE_ACTIVATION_INVOLVED_IN_IMMUNE_RESPONSE	1.55799	0.0644336
	GO_INTERFERON_BETA_PRODUCTION	1.55403	0.0656071
	GO_INTERLEUKIN_6_SECRETION	1.55113	0.0666378
	GO_REGULATION_OF_ANTIGEN_RECEPTOR_MEDIATED_SIGNALING_PATHWAY	1.54708	0.067705
	GO_POSITIVE_REGULATION_OF_LEUKOCYTE_DIFFERENTIATION	1.53984	0.0703696
	GO_LYMPHOCYTE_DIFFERENTIATION	1.53939	0.0698863
	GO_POSITIVE_REGULATION_OF_T_CELL_PROLIFERATION	1.53381	0.0719087
	GO_INTERLEUKIN_6_PRODUCTION	1.53111	0.072599
	GO_CYTOKINE_PRODUCTION_INVOLVED_IN_IMMUNE_RESPONSE	1.52257	0.0765214
	KEGG_T_CELL_RECEPTOR_SIGNALING_PATHWAY	1.52015	0.0771975
	GO_REGULATION_OF_CYTOKINE_PRODUCTION_INVOLVED_IN_IMMUNE_RESPONSE	1.51752	0.0779128
	GO_NEGATIVE_REGULATION_OF_LYMPHOCYTE_ACTIVATION	1.51583	0.0781018
	GO_CD8_POSITIVE_ALPHA_BETA_T_CELL_ACTIVATION	1.51301	0.0787376
	GO_REGULATION_OF_TUMOR_NECROSIS_FACTOR_MEDIATED_SIGNALING_PATHWAY	1.50831	0.0805224
	GO_LYMPHOCYTE_CHEMOTAXIS	1.50594	0.0809828
	GO_T_CELL_APOPTOTIC_PROCESS	1.50448	0.0813278
	GO_NEGATIVE_REGULATION_OF_TYPE_I_INTERFERON_PRODUCTION	1.50194	0.0816058
	GO_POSITIVE_REGULATION_OF_CD4_POSITIVE_ALPHA_BETA_T_CELL_ACTIVATION	1.50097	0.0815
	GO_LEUKOCYTE_APOPTOTIC_PROCESS	1.49846	0.0821607
	GO_RESPONSE_TO_INTERLEUKIN_12	1.4872	0.0869863
	GO_POSITIVE_REGULATION_OF_LYMPHOCYTE_MEDIATED_IMMUNITY	1.48712	0.0863453
	GO_POSITIVE_REGULATION_OF_ALPHA_BETA_T_CELL_PROLIFERATION	1.48712	0.0856639
	GO_POSITIVE_REGULATION_OF_INTERLEUKIN_12_PRODUCTION	1.48267	0.0874678
	GO_T_CELL_PROLIFERATION	1.48165	0.0873508
	GO_REGULATION_OF_T_HELPER_17_TYPE_IMMUNE_RESPONSE	1.4813	0.0869328
	GO_REGULATION_OF_LYMPHOCYTE_MEDIATED_IMMUNITY	1.48076	0.0865234
	GO_ANTIGEN_PROCESSING_AND_PRESENTATION_OF_PEPTIDE_OR_POLYSACCHARIDE_ANTIGEN_VIA_MHC_CLASS_II	1.47268	0.0898642
	GO_NEGATIVE_REGULATION_OF_INNATE_IMMUNE_RESPONSE	1.46944	0.0906592
	GO_REGULATION_OF_T_CELL_CYTOKINE_PRODUCTION	1.46625	0.0917618
	GO_T_CELL_LINEAGE_COMMITMENT	1.46596	0.0911161
	GO_REGULATION_OF_LEUKOCYTE_DEGRANULATION	1.46357	0.0915968
	GO_NEGATIVE_REGULATION_OF_ALPHA_BETA_T_CELL_DIFFERENTIATION	1.4605	0.0928011
	GO_POSITIVE_REGULATION_OF_LYMPHOCYTE_ACTIVATION	1.45105	0.0976167
	GO_T_CELL_SELECTION	1.45067	0.0970759
	GO_INTERLEUKIN_6_BIOSYNTHETIC_PROCESS	1.44871	0.0976786
	GO_T_CELL_DIFFERENTIATION_IN_THYMUS	1.44574	0.0989239
	GO_MYELOID_LEUKOCYTE_DIFFERENTIATION	1.4444	0.0991069
	GO_NEGATIVE_REGULATION_OF_MYELOID_LEUKOCYTE_DIFFERENTIATION	1.44405	0.0985291

## Sheet: Table S4
	Table S4. Functional annotation clustering by DAVID and pathway enrichment analysis by GSEA in the colon of mice
	DAVID analysis results for colon performed by using significantly DEGs (FDR<0.1).
	DAVID Colon
	Annotation Cluster 1	Enrichment Score: 1.52	Fold Enrichment	FDR
	GOTERM_CC_DIRECT	GO:0005789~endoplasmic reticulum membrane	2.49	27.0762
	UP_KEYWORDS	Endoplasmic reticulum	2.16	31.2028
	Annotation Cluster 2	Enrichment Score: 1.31
	UP_KEYWORDS	Lectin	6.78	2.2949
	GOTERM_MF_DIRECT	GO:0030246~carbohydrate binding	5.02	8.1503
	UP_SEQ_FEATURE	domain:C-type lectin	5.57	75.6465
	Annotation Cluster 3	Enrichment Score: 1.22
	UP_KEYWORDS	Lectin	6.78	2.2949
	GOTERM_MF_DIRECT	GO:0030246~carbohydrate binding	5.02	8.1503
	GOTERM_BP_DIRECT	GO:0002376~immune system process	2.57	86.5837
	UP_KEYWORDS	Immunity	2.44	85.573
	UP_KEYWORDS	Innate immunity	2.43	99.4339
	GSEA analysis results for colon
	GSEA NoA vs Vancomycin
	NAME		NES	FDR-qval
	GO_POSITIVE_REGULATION_OF_MACROPHAGE_MIGRATION		2.12565	0.00391514
	GO_MYELOID_LEUKOCYTE_CYTOKINE_PRODUCTION		1.96626	0.0245315
	GO_NEGATIVE_REGULATION_OF_MYELOID_LEUKOCYTE_DIFFERENTIATION		1.9292	0.0272228
	GO_REGULATION_OF_MACROPHAGE_MIGRATION		1.86153	0.0528007
	GO_MACROPHAGE_DIFFERENTIATION		1.81505	0.0778151
	GO_REGULATION_OF_TYPE_2_IMMUNE_RESPONSE		1.79662	0.0825309
	GO_NEGATIVE_REGULATION_OF_LEUKOCYTE_DIFFERENTIATION		1.76679	0.0983135
	GO_MACROPHAGE_MIGRATION		1.75899	0.0918072
	GO_MONONUCLEAR_CELL_MIGRATION		1.74144	0.0975566
	GO_REGULATION_OF_MONONUCLEAR_CELL_MIGRATION		1.6743	0.0997133
	GO_NATURAL_KILLER_CELL_ACTIVATION_INVOLVED_IN_IMMUNE_RESPONSE		-1.8494	0.0980681
